# Supplementary material for: The structure of the endogenous ESX-3 secretion system
Source: eLife. 2019 Dec 30;8:e52983. doi: 10.7554/eLife.52983 (PMC6986878; doi:10.7554/eLife.52983)
Supplement: Supplementary file 2. [file elife-52983-supp2.xlsx]

## Sheet: Sheet1
Top Dali Server Hits
Hit Rank	PDB Chain ID	Z score	RMSD	lali	nres	%id	Description
EccB3
1	6KRE-B	2.7	5.8	59	444	7	T-complex protein 1 subunit alpha
2	None	NA	NA	NA	NA	NA	NA
EccC3
1	4NH0-A	14.8	3.3	207	861	16	Cell division FtsK/SpoIIE (EccC)
2	2IUU-A	14.5	4.9	198	408	16	DNA translocase FtsK
3	4NLA-A	13.9	3.4	205	555	18	Cell division FtsK/SpoIIE
4	4LYA-A	12.8	3.4	198	521	14	EssC
5	5FV0-A	11.9	3.2	182	508	13	EssC
EccD3
1	4KV2-A	9.9	1.6	70	90	30	ESX-1 Secretion system protein EccD1
2	3QKY-A	9.3	10.3	138	251	7	Outer membrane assembly lipoprotein (BamD)
3	6E9V-J	9.2	7.2	156	211	10	Dhf79 filament
4	3J99-G	9.2	8.3	150	286	7	Vesicle-fusing ATPase
5	5WFU-A	9.1	5.8	119	234	3	14-3-3 protein beta/alpha
EccE3
1	5FXF-B	7.5	7.1	184	525	6	Eugenol oxidase
2	5L6G-A	7.1	6.6	168	473	9	FAD linked oxidase-like protein
3	2AXR-A	7	7	166	479	10	Glucooligosaccharide oxidase
4	6F73-B	7	7.9	164	548	12	MTVA0615
5	4P52-A	6.6	11.8	98	315	8	Homoserine kinase
